# Supplementary material for: A biocompatible polyethylene glycol/alginate composite hydrogel with significant reactive oxygen species consumption for promoting wound healing
Source: Royal Society of Chemistry journal article supplement (doi:10.1039/d3tb00771e), 2023-01-01
Supplement: d3tb00771e1.pdf [file d3tb00771e1.pdf]

## *Supporting Information*

# **Biocompatible Polyethylene Glycol/Alginate Composite Hydrogel with Significant Reactive Oxygen Species Consumption for Promoting Wound Healing**

*Nan Wang,<sup>a,c</sup> Kang-Kang Yu,<sup>b\*</sup> Kun Li,<sup>a</sup> Xiao-Qi Yu<sup>a,c</sup>*

<sup>a</sup> Key Laboratory of Green Chemistry and Technology, Ministry of Education, College of Chemistry, Sichuan University, Chengdu, China 610064

<sup>b</sup> Key Laboratory of Bio-resources and Eco-environment, Ministry of Education, College of Life Sciences, Sichuan University, Chengdu, China, 610064

<sup>c</sup> Asymmetric Synthesis and Chiral Technology Key Laboratory of Sichuan Province, Department of Chemistry, Xihua University, Chengdu, China, 610039

\*E-mail: kangkangyu@scu.edu.cn;

## **Contents**

- 1.  $^1\text{H}$  NMR spectrum of purified of poly (ethylene glycol) diacrylate**
- 2. The relationship between time and dehydration ratio in first 95 minutes**
- 3. In vitro response experiment of *hdg*-PEGDA to active oxygen consumption and the self-consumption of hypochlorous acid within 60 minutes**
- 4. Nucleus and cytoskeleton morphology of HepG2 cells**
- 5. Dead images of L929 cells treated with different conditions**
- 6. Nucleus and cytoskeleton morphology of L929 cells after treated with different concentrations of SA degradation products and live/dead images of L929 cells after co-cultured with SA degradation products for 24 h**
- 7. Analysis of the expression percentage of collagen fiber in Masson staining experiment**

1. Characterization of purified poly (ethylene glycol) diacrylate.

Poly (ethylene glycol) diacrylate was purified and characterized by Agilent AV 400.  $^1\text{H}$  NMR (400 MHz,  $\text{CDCl}_3$ )  $\delta$  6.45 – 6.37 (m, 2H), 6.18 – 6.09 (m, 2H), 5.86 – 5.79 (m, 2H), 4.34 – 4.24 (m, 4H), 3.72 (dt,  $J = 11.6, 4.5$  Hz, 4H), 3.62 (d,  $J = 0.6$  Hz, 72H).

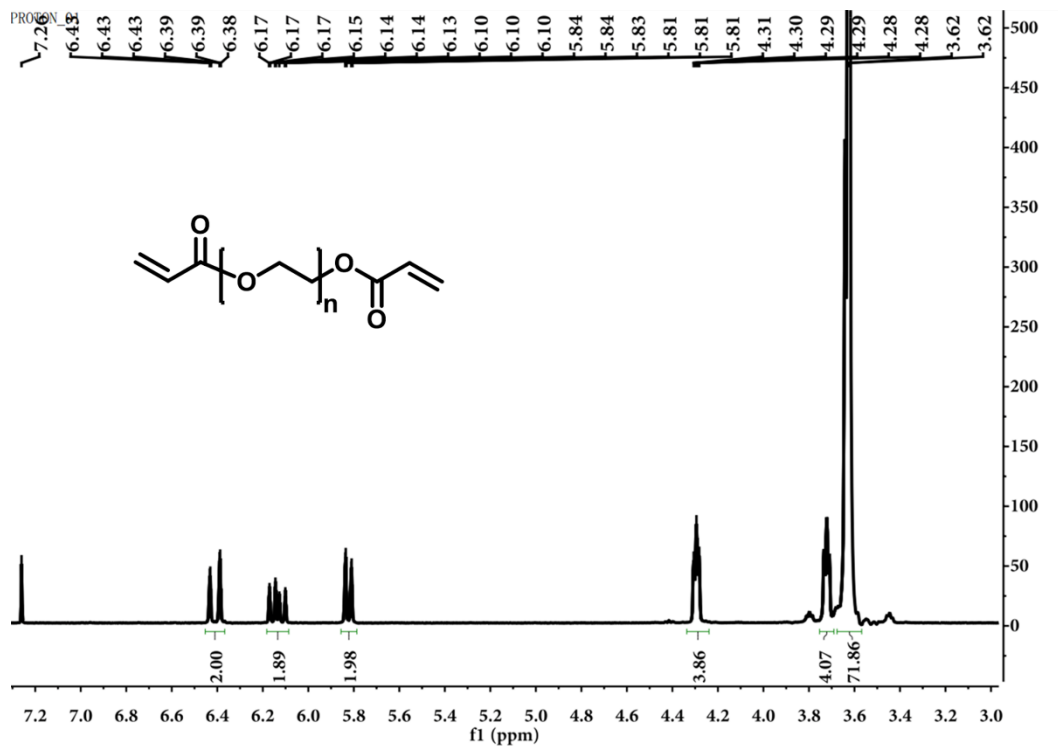

**Figure S1.**  $^1\text{H}$  NMR spectrum of purified poly (ethylene glycol) diacrylate in  $\text{CDCl}_3$ .

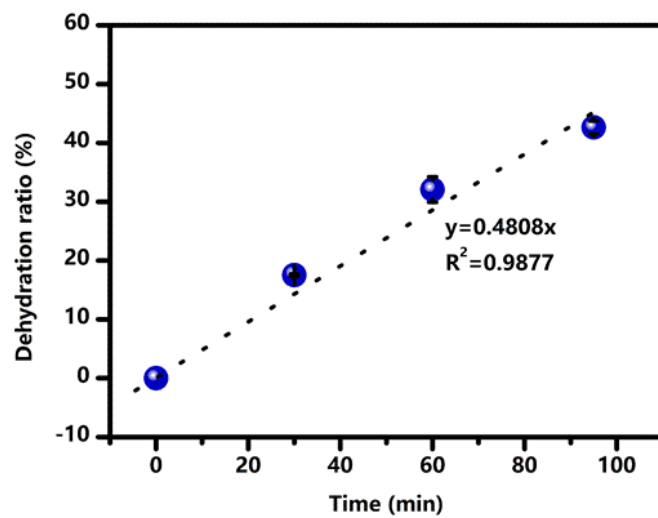

**Figure S2.** Simulation of *hdg*-PEGDA dehydration in the first 95 minutes.

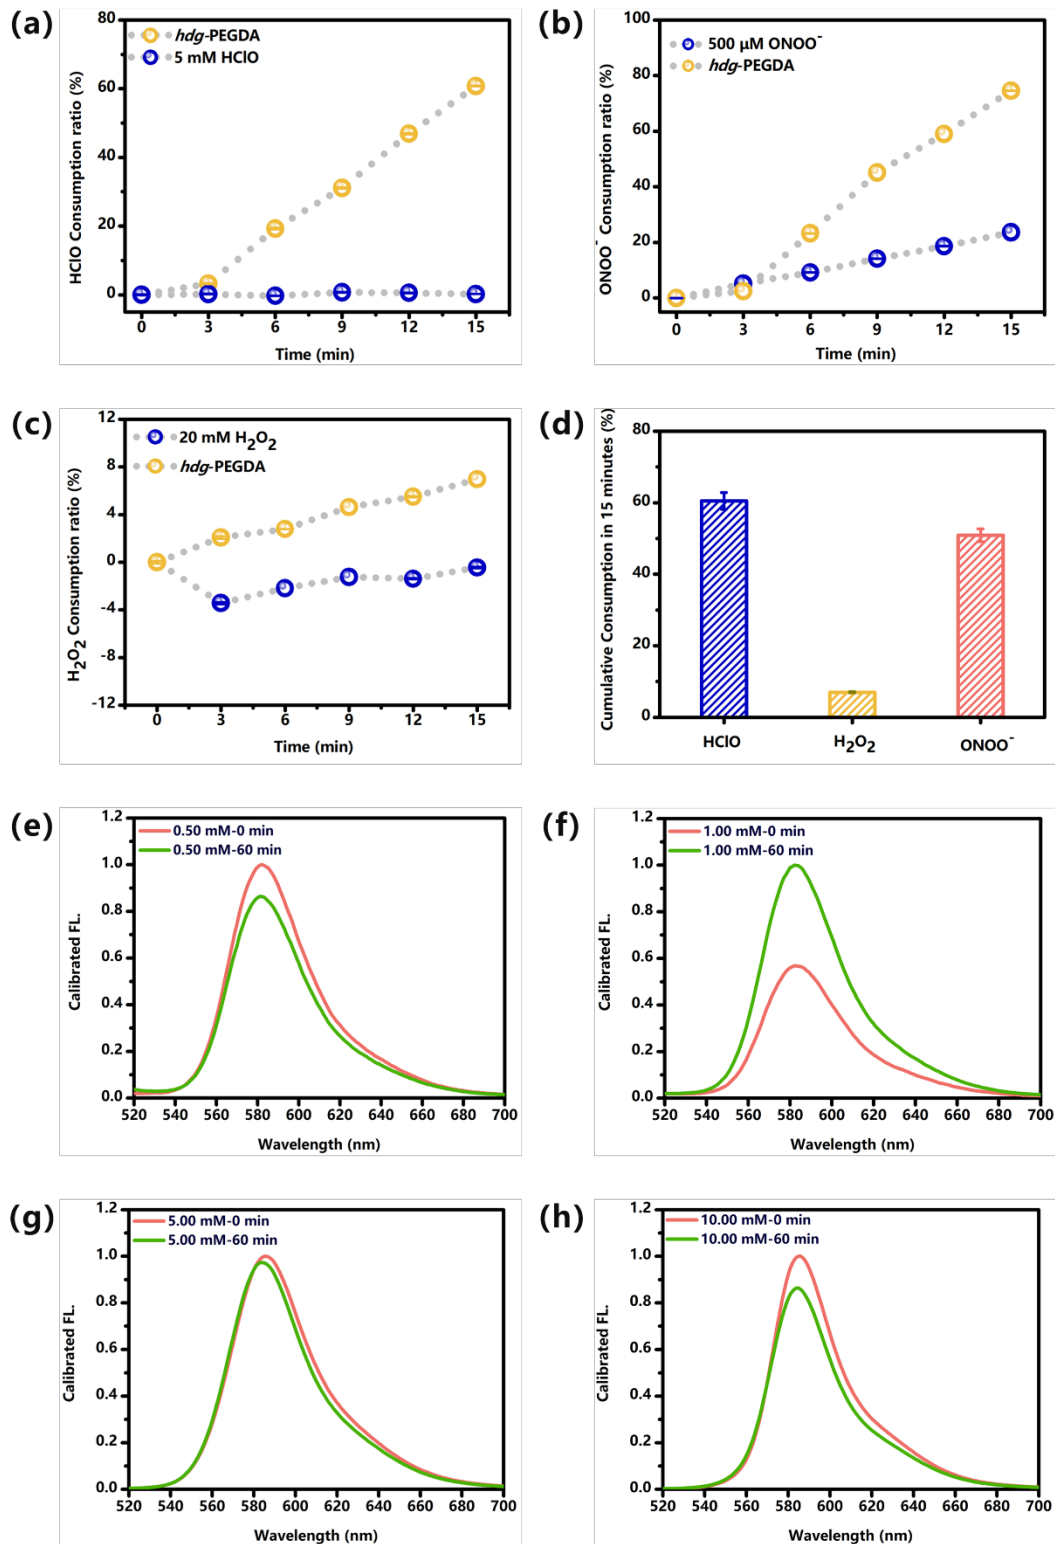

**Figure S3.** (a-c) *hdg*-PEGDA consumption on different types of reactive oxygen species (ROS).

(d) The cumulative consumption in 15 minutes of hydrogel *hdg*-PEGDA on different types of

ROS. (e-h) The self-consumption of different concentrations of hypochlorous acid within 60 minutes.

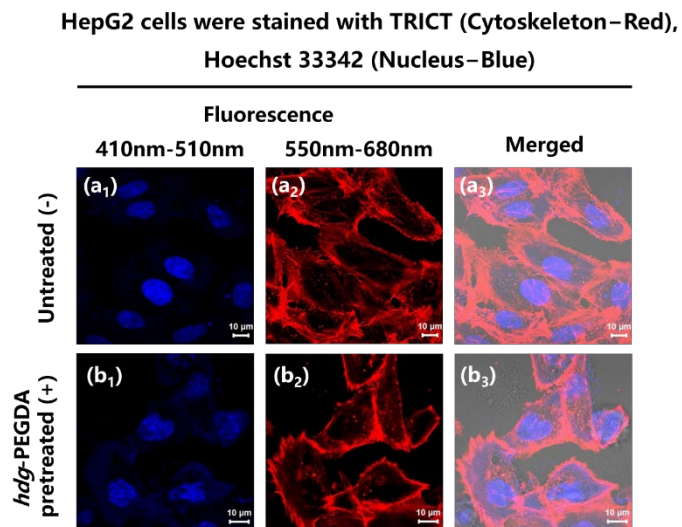

**Figure S4.** Nucleus and cytoskeleton morphology of HepG2 cells after *hdg*-PEGDA treatment (b<sub>1</sub>-b<sub>3</sub>) and untreated (a<sub>1</sub>-a<sub>3</sub>).

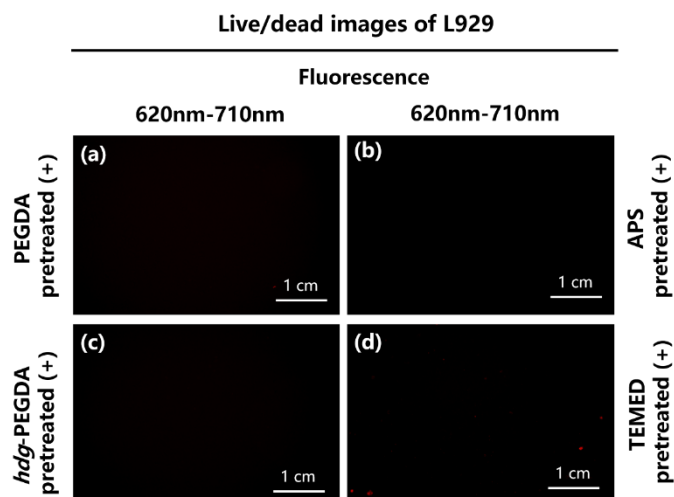

**Figure S5.** (a-d) Dead images of L929 cells treated with different conditions.

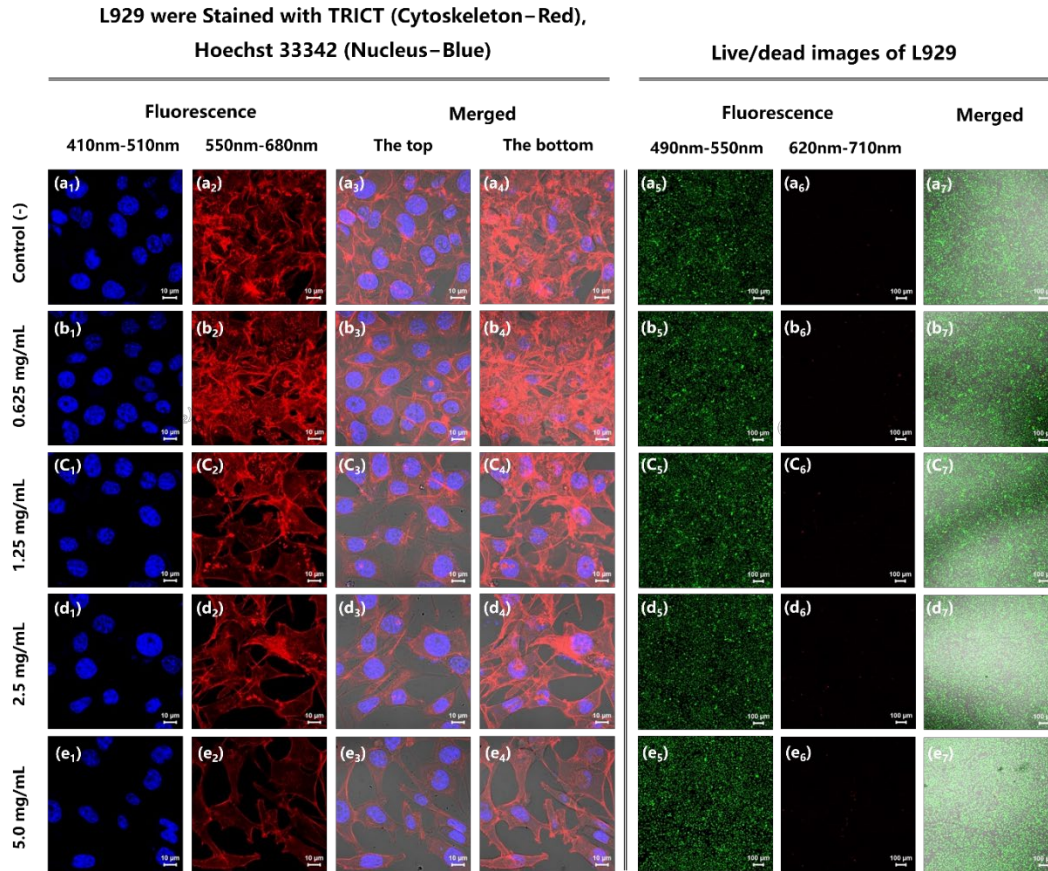

**Figure S6.** (a<sub>1</sub>-a<sub>4</sub>), (b<sub>1</sub>-b<sub>4</sub>), (c<sub>1</sub>-c<sub>4</sub>), (d<sub>1</sub>-d<sub>4</sub>) and (e<sub>1</sub>-e<sub>4</sub>): nucleus and cytoskeleton morphology of L929 cells after treated with different concentrations of SA degradation products. (a<sub>5</sub>-a<sub>7</sub>), (b<sub>5</sub>-b<sub>7</sub>), (c<sub>5</sub>-c<sub>7</sub>), (d<sub>5</sub>-d<sub>7</sub>) and (e<sub>5</sub>-e<sub>7</sub>): Live/dead images of L929 cells after co-cultured with SA degradation products for 24 hours.

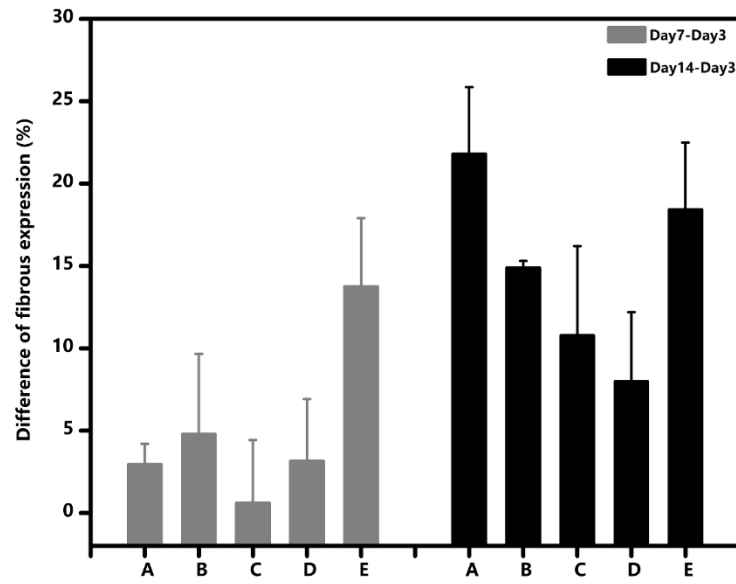

**Figure S7.** Analysis of the expression percentage of collagen fiber in Masson staining experiment.
